# Supplementary material
Source: HighWire-hosted journal article supplement (https://bmjopen.bmj.com/content/14/7/e082712)
Supplement: inline-supplementary-material-2 [file inline-supplementary-material-2.pdf]

Supplemental material

Contents

s-Figure 1: AsianNeo governance structure ..... 1

s-Table 1: Variable list of the AsianNeo registry ..... 2

s-Figure 1: AsianNeo governance structure

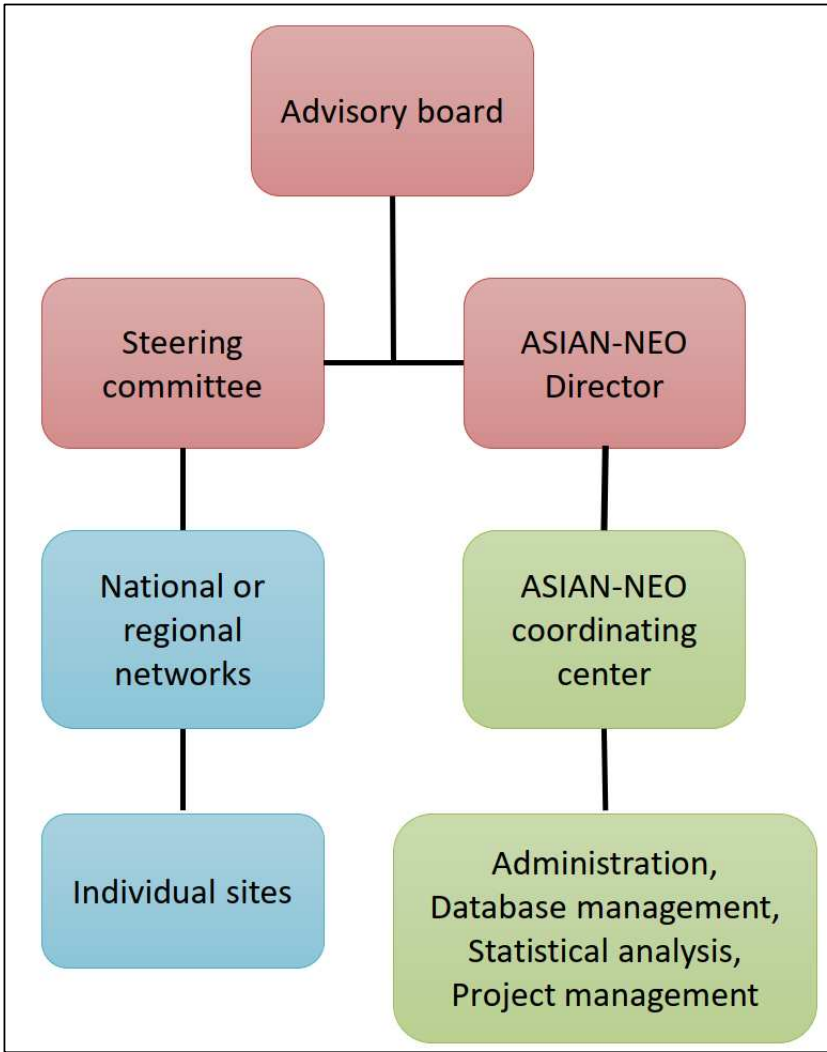

s-Table 1: Variable list of the AsianNeo registry

|           | Variable                              | Unit/answer choices                 | Definitions/ notes                                                                                                                                                                         |
|-----------|---------------------------------------|-------------------------------------|--------------------------------------------------------------------------------------------------------------------------------------------------------------------------------------------|
| Mother    | maternal age                          | age                                 | Maternal age at delivery                                                                                                                                                                   |
|           | gravida                               | number of times                     | Not including current pregnancy*                                                                                                                                                           |
|           | parity                                | number of times                     | Not including current pregnancy*                                                                                                                                                           |
| Pregnancy | multiple fetus                        | number                              | Number of fetuses at birth                                                                                                                                                                 |
|           | plurality                             | monochorionic /dichorionic/un known | If multiple pregnancy, specify mono- or multi-chorionic                                                                                                                                    |
|           | Pregnancy DM                          | Y/N/U (Yes/No/Unkown)               | Including GDM<br>Maternal diabetes mellitus or gestational diabetes mellitus                                                                                                               |
|           | chronic hypertension                  | Y/N/U                               | Maternal hypertension diagnosed before this pregnancy                                                                                                                                      |
|           | pregnancy induced hypertension        | Y/N/U                               | Including pregnancy induced renal disease and hypertension, superimposed pregnancy induced hypertension, and eclampsia                                                                     |
|           | CAM clinical                          | Y/N/U                               | Diagnosed based on the clinical findings such as maternal fever, leukocytosis, and local pain                                                                                              |
|           | CAM pathological                      | Y/N/U                               | Diagnosed with pathological examination                                                                                                                                                    |
|           | maternal eclampsia                    | Y/N/U                               | Maternal eclampsia                                                                                                                                                                         |
|           | maternal abruptio placenta            | Y/N/U                               | Maternal abruptio placenta                                                                                                                                                                 |
|           | Cord prolapse                         | Y/N/U                               | Cord prolapse                                                                                                                                                                              |
| Delivery  | PROM                                  | Y/N/U                               | Defined as rupture of membranes before an onset of labor                                                                                                                                   |
|           | maternal antibiotics                  | Y/N/U                               | Maternal medication within the period mother is in labor, with the intent of preventing infection of the fetus. This includes the prophylactic use of parenteral penicillin or ampicillin. |
|           | MgSO4                                 | Y/N/U                               | Maternal medication (prior to delivery)                                                                                                                                                    |
|           | maternal steroid (partial vs complete | Y/N/U                               | Defined as administration of any corticosteroids to accelerate fetal lung maturity                                                                                                         |

|         |                                                                 |                                                                                |                                                                                     |
|---------|-----------------------------------------------------------------|--------------------------------------------------------------------------------|-------------------------------------------------------------------------------------|
|         | course, if possible)                                            |                                                                                |                                                                                     |
|         | NRFS                                                            | Y/N/U                                                                          | Defined as non-reassuring fetal status                                              |
|         | delivery mode                                                   | vaginal birth/<br>vaginal<br>(vacuum extraction,<br>forceps)/caesarean section | Mode of delivery                                                                    |
|         | cord-blood transfusion (delayed cord clamping/<br>cord milking) | Y/N/U                                                                          | Defined as any method of cord blood transfusion at birth                            |
| Neonate | age of admission                                                | day after birth (must be less than 28 days after birth)                        | Must be less than 28 days after birth                                               |
|         | admission temperature                                           | °C                                                                             | Within the first hour after admission                                               |
|         | sex                                                             | M/F/U                                                                          | Male/Female/Ambiguous                                                               |
|         | outborn                                                         | Y/N                                                                            | If an infant was born outside a participating hospital, yes                         |
|         | gestational age                                                 | week, day                                                                      | Gestational age                                                                     |
|         | confirmation of gestational age with US                         | Y/N                                                                            | If gestational age was determined by the obstetric examination with ultrasonography |
|         | Apgar at 1 min                                                  | number                                                                         | Apgar score                                                                         |
|         | Apgar at 5 min                                                  | number                                                                         | Apgar score                                                                         |
|         | Apgar at 10 min                                                 | number                                                                         | Apgar score                                                                         |
|         | oxygen use at birth                                             | Y/N                                                                            | Resuscitation with oxygen                                                           |
|         | face mask ventilation at birth                                  | Y/N                                                                            | Face mask ventilation at birth                                                      |
|         | epinephrine at birth                                            | Y/N                                                                            | Resuscitation with epinephrine at birth                                             |
|         | chest compression during initial resuscitation                  | Y/N                                                                            | Resuscitation with cardiac compression at birth                                     |
|         | NCPAP at birth                                                  | Y/N                                                                            | NCPAP use at birth                                                                  |

|                    |                                  |                 |                                                                                                                                                  |
|--------------------|----------------------------------|-----------------|--------------------------------------------------------------------------------------------------------------------------------------------------|
|                    | endotracheal intubation at birth | Y/N             | Resuscitation with an endotracheal tube                                                                                                          |
|                    | birthweight                      | g               | Body weight at birth                                                                                                                             |
|                    | body length at birth             | cm              | Body length at birth                                                                                                                             |
|                    | HC at birth                      | cm              | Head circumference at birth. If not available, enter the value at the first examination                                                          |
|                    | NICU admission                   | Y/N             | If an infant was cared in NICU, yes                                                                                                              |
|                    | cord blood gas pH                | number          | Measured pH                                                                                                                                      |
|                    | cord blood gas PCO2              | number          | PCO2 in Torr                                                                                                                                     |
|                    | cord blood gas BE                | number          | mmol/L of base excess in negative value                                                                                                          |
| Respiratory system | RDS                              | Y/N             | Diagnosed by clinical and radiographic findings<br>ARDS not included                                                                             |
|                    | airleak                          | Y/N             | Any type of air leak included                                                                                                                    |
|                    | pulmonary hemorrhage             | Y/N             | only massive hemorrhage included                                                                                                                 |
|                    | PPHN                             | Y/N             | Defined as right-to-left shunt at foramen oval and/or ductus arteriosus without any anatomical malformation detected by cardiac echocardiography |
|                    | duration of O2 supply            | days            | Days of age when oxygen supplementation stopped<br>If still on: 999                                                                              |
|                    | duration of CPAP                 | days            | CPAP and DPAP not included                                                                                                                       |
|                    | duration of MV                   | days            | Days of CPAP and DPAP not included MV                                                                                                            |
|                    | HFO                              | Y/N             | Use of HFO for mechanical ventilation                                                                                                            |
|                    | Surfactant administration        | number of times | Pulmonary surfactant (Surfacten®) given during the acute phase of respiratory problems                                                           |
|                    | iNO use                          | days            | Days of iNO                                                                                                                                      |
|                    | CLD 28d of birth                 | Y/N             | Supplemental oxygen with chest X-ray changes on 28th day after birth                                                                             |
|                    | CLD systemic steroid             | Y/N             | Steroid given during the hospital stay for prevention or treatment of CLD                                                                        |
|                    | CLD 36wk demand of O2            | Y/N             | Supplemental oxygen use at 36th week postmenstrual age                                                                                           |
|                    | CLD 36wk demand of               | Y/N             | Supplemental CPAP use at 36th week postmenstrual age                                                                                             |

|                        |                                                      |                                  |                                                                                                                           |
|------------------------|------------------------------------------------------|----------------------------------|---------------------------------------------------------------------------------------------------------------------------|
|                        | respiratory support                                  |                                  |                                                                                                                           |
| Circulatory system     | PDA                                                  | Y/N                              | Diagnosed by both echocardiographic findings and clinical evidence of volume overload due to left-to-right shunt          |
|                        | drug use for PDA                                     | Y/N                              | Regardless of purpose of use (prophylactic use and therapeutic use), if use drug for PDA, choose yes                      |
|                        | PDA surgery                                          | Y/N                              | Operation for PDA                                                                                                         |
| Central nervous system | IVH                                                  | Y/N                              | Diagnosed with cranial echography<br>Subependymal and intra choroid plexus hemorrhage included                            |
|                        | IVH grade                                            | I/II/III/IV                      | According to the classification of Papile                                                                                 |
|                        | IVH hydrocephalus                                    | Y/N                              | Only hydrocephalus treated shunt operation                                                                                |
|                        | cPVL                                                 | Y/N                              | Only cystic PVL diagnosed by using either head ultrasound or cranial MRI scans, performed after two weeks of age or later |
|                        | Shunt or reservoir for hydrocephalus                 | Y/N                              | Use of shunt or reservoir for hydrocephalus                                                                               |
| Infection              | sepsis (late onset sepsis (after 72hours of birth)   | Y/N (after 72hours of birth)     | Culture proven septicemia or bacteremia                                                                                   |
|                        | early onset sepsis within 72hours after birth        | Y/N (within 72hours after birth) | Culture proven septicemia or bacteremia                                                                                   |
|                        | fungal infection after day3                          | Y/N                              | Culture proven at any time during the stay in NICU                                                                        |
|                        | meningitis                                           | Y/N                              | Diagnosed based on CSF examination or clinical symptoms                                                                   |
| Digestive system       | NEC                                                  | Y/N                              | Defined according to Bell's classification stage II or greater                                                            |
|                        | perforation                                          | Y/N                              | Diagnosed if free air was detected in the abdominal cavity by X-ray examination due to other than NEC                     |
|                        | surgery for NEC, suspected NEC, or bowel perforation | Y/N                              | Including laparotomy and drainage                                                                                         |
|                        | probiotics                                           | Y/N                              | Use of probiotics                                                                                                         |

|                     |                                 |                                                                                                                                                              |                                                                                  |
|---------------------|---------------------------------|--------------------------------------------------------------------------------------------------------------------------------------------------------------|----------------------------------------------------------------------------------|
| Retinopathy         | ROP stage                       | Stage 1, Stage 2, Stage 3, Stage 4, Stage 5                                                                                                                  | Worst stage according to the International classification                        |
|                     | Tx (laser, cryotherapy)         | Y/N                                                                                                                                                          | If infants were treated with either laser- or cryo-coagulation therapy, or both. |
|                     | anti VEGF                       | Y/N                                                                                                                                                          | Use of anti-VEGF antibody                                                        |
| Other complications | congenital anomaly              | Y/N                                                                                                                                                          | Only major and fatal anomaly                                                     |
|                     | diagnosis of congenital anomaly | code (NRN operation manual)                                                                                                                                  | Enter a code for major congenital anomaly Refer Table 2 in operational manual    |
| Feeding             | feeding at 120 ml/kg/day        | days after birth                                                                                                                                             | days to reach feeding at 120 ml/kg/day                                           |
|                     | enteral feeding >100ml/kg/day   | days after birth                                                                                                                                             | days to reach feeding over 100 ml/kg/day                                         |
|                     | discharge feeding status        | Breast milk 100%/ Formula 100%/Mix/ No data (death)                                                                                                          | Feeding status at discharge                                                      |
| Discharge           | age of discharge                | days after birth                                                                                                                                             | Day of age at discharge                                                          |
|                     | death at discharge              | Alive/Death                                                                                                                                                  | Death at discharge                                                               |
|                     | cause of death                  | ICD11                                                                                                                                                        | Refer to algorithm of cause of death                                             |
|                     | disposition to home             | home/others                                                                                                                                                  | Home: discharge to home/ Others: discharge to the place excepting home           |
|                     | place to transfer               | hospital at birth/NICU in other hospital/pediatric department in the hospital/pediatric department in other hospital/facilities for the disabled/infant home | Place to hospital transfer                                                       |
|                     | HOT (discharge-oxygen)          | Y/N                                                                                                                                                          | Use of home oxygen after discharge                                               |
|                     | bodyweight at discharge         | g                                                                                                                                                            | Body weight at discharge                                                         |

|  |                             |         |                                                                                                                    |
|--|-----------------------------|---------|--------------------------------------------------------------------------------------------------------------------|
|  | body length at discharge    | cm      | Body length at discharge                                                                                           |
|  | HC at discharge             | cm      | Head circumference at discharge                                                                                    |
|  | growth status at 36week PMA | SGA/AGA | According to Fenton reference, defined as Small-for-Gestational-Age (SGA) or Appropriate-for-Gestational-Age (AGA) |
